# Supplementary material
Source: PubMed Central journal article supplement (PMC3000279)
Supplement: 1010167107_pnas.201010167SI.pdf [file 1010167107_pnas.201010167SI.pdf]

# Supporting Information

Lacroix et al. 10.1073/pnas.1010167107

## SI Materials and Methods

**Generation of *E4F1*<sup>-flox</sup> and Compound Mice.** The *E4F1* targeting construct was generated by cloning *129/SvJ* murine genomic *E4F1* sequences (1) into the pDT915 targeting vector. Lox-P sites were introduced before exon 4 and after exon 14, as shown in Fig. S1. A hygromycin-TK cassette flanked by two FRT sequences was added after the polyA signal of the *E4F1* gene. The targeting vector was linearized by NotI and electroporated in J1 ES cells (*129/SvJ*). The latter were selected with hygromycin B (130 µg/mL; Calbiochem) for 1 wk before clonal amplification. Correct targeting of the *E4F1* locus was assessed on genomic DNA prepared from hygromycin-resistant ES clones by Southern blot analysis using probes corresponding to 5' (400 bp) and 3' (360 bp) flanking sequences of the *E4F1* gene (Fig. S1). Targeted ES cells were electroporated with a flippase-expressing vector (a gift of Dr. S. Dymecki, Harvard Medical School, Boston) and selected using ganciclovir (4 µM) to enrich for clones in which the hygromycin-TK cassette was deleted. Several *E4F1*<sup>+flox</sup> ES clones displaying a normal karyotype were subsequently injected into *C57BL/6* blastocysts. Chimeric mice were mated with *C57BL/6* mice for germline transmission of the *E4F1* flox allele. Heterozygous mutant mice *E4F1*<sup>+flox</sup> and *E4F1*<sup>+/-</sup> were interbred to generate *E4F1*<sup>-flox</sup> animals. *E4F1* recombination was assessed by immunoblot analysis or by quantitative PCR analysis on skin genomic DNA using primers specific for the *E4F1* locus, as shown in Fig. S1 C–E (primer A: 5'-GGCTGCTGCGTGGATTTC; primer B: 5'-GCTAGGTAGGGTAGGAGGCTGTCT; primer C: 5'-ACCGCGTGTCTCACTCAGAC; primer D: 5'-GCAGAACTGGCACACGTGG; primer E: 5'-TTCGGTATAGTGTGGAGG; primer F: 5'-AGGGGCTGGGCTACAATGG).

*E4F1*<sup>-flox</sup> mice were crossed with *Cre-ER*<sup>T2</sup> knock-in mice (*RERT*) (2) or *K5-Cre* transgenic mice (3) to obtain *E4F1*<sup>-flox</sup>; *RERT*<sup>K1/K1</sup> and *E4F1*<sup>-flox</sup>; *K5-Cre* mice, respectively. *E4F1*<sup>flox</sup>; *RERT* mice also were crossed with *K15-EGFP* transgenic mice (Jackson Laboratory) (4) to generate *E4F1*<sup>flox</sup>; *RERT*<sup>K1/K1</sup>; *K15-GFP* mice and with *Ink4a/Arf*<sup>-/-</sup> mice (5) to generate *E4F1*<sup>flox</sup>; *RERT*<sup>K1/K1</sup>; *Ink4a/Arf*<sup>-/-</sup> mice.

**Genotyping.** *E4F1*<sup>flox</sup>; *RERT* mice were genotyped by PCR on tail genomic DNA using the following primers: (i) *E4F1* WT (*E4F1*<sup>+</sup>) and conditional KO flox alleles (*E4F1*<sup>flox</sup>): 5'-CCTTGAGCACGGAGGAGAGC-3' and 5'-GCCCTAGCCTGCTC-TGCCATC-3'; (ii) *E4F1* constitutive KO allele (*E4F1*<sup>-</sup>): 5'-CACTGCTTGAGGACTTTG-3' and 5'-CCTCTGTTCCACA-TACACTTCATTC-3'; (iii) WT and knock-in *RERT* alleles: 5'-GTCAGTACACATACAGACTT-3', 5'-TGAGCGAACAGGGCGAA-3', and 5'-TCCATGGAGCACCCAGTGAA-3'; (iv) *K5-Cre* transgene: 5'-AACATGCTTCATCGTCGG-3' and 5'-TTCGGATCATCAGCTACACC-3'; (v) *K15-GFP* transgene: 5'-CTACGCGTGCAGTCTTCAGC-3' and 5'-GGCGAGCTGCA-CGCTGCGTCCTC-3'; and (vi) *Ink4a/Arf* alleles: WT, 5'-ATGATGATGGGCAACGTTT-3' and 5'-CAAATATCGCACGATGTC-3'; KO, 5'-CTATCAGGACATAGCGTTGG-3' and 5'-AGTGAGAGTTTTGGGGACAGAG-3'.

**Histochemistry and Immunolabeling of Skin Sections and Whole Mounts.** Skin biopsy specimens were either fixed in 4% neutral-buffered formalin (24 h) and paraffin-embedded or frozen in Tissue-Tek OCT Compound (Sakura) for cryosectioning. Paraffin-embedded tissues were sectioned and processed for IHC or H&E staining. IHC was performed on 4-µm sections using appropriate primary antibodies: anti-*E4F1* (B-21 rabbit polyclonal, generated

by our laboratory), anti-Ki67 (SP6; Neomarkers), anti-K6 (SPM269; Abcam), anti-K10 (PRB-159P; Covance), anti-involucrin (Sc15230; Santa Cruz Biotechnology), anti-CD34 (RAM34; BD Pharmingen), and anti-K15 (LHK15; Vector Laboratories). All secondary antibodies were diluted at 1:200 in biotinylated secondary antibody coupled to streptavidin-peroxidase complex (ABC Vectastain Kit; Vector Laboratories). Revelation was performed using the peroxidase substrate DAB (Vector Laboratories). Immunohistofluorescence staining with anti-α6-integrin (GoH3; BD Biosciences) and anti-K14 (AF64; Covance) were performed on 10-µm cryosections fixed for 10 min in 100% acetone. Secondary alexa-conjugated antibodies were diluted at 1:1,000 for immunohistofluorescence (Invitrogen).

Apoptotic cells were detected using a TUNEL staining kit (Roche) or by IHC with anti-caspase 3 antibody. For morphological analysis of sebaceous glands, whole mounts of tail epidermis were stained with Nile red (0.1 mg/mL; Sigma-Aldrich) for 30 min at room temperature.

BrdU-positive cells were detected using anti-BrdU antibody (BD Biosciences). Whole mounts of tail epidermis and detection of LRCs were prepared as described previously (6), and pictures were generated using a Zeiss 510 confocal microscope and presented as Z-stack projections after deconvolution with Imaris software (Bitplane).

**Culture of Primary Keratinocytes and Clonogenic Assays.** Murine primary keratinocytes were isolated from newborn skin after overnight treatment with dispase (5 mg/mL; Roche) or from adult back skin after overnight treatment with trypsin-EDTA, and were grown in calcium-free Eagle's minimal essential medium (Bio-Whittaker; Lonza) containing 10% calcium-free FCS (Sigma-Aldrich) and 10 µg/mL of murine EGF (Roche). Cre-mediated recombination of *E4F1* flox alleles was achieved by adding 4OHT (1 µM; Sigma-Aldrich) to the culture medium. Human primary keratinocytes were isolated from skin biopsy specimens obtained after medical surgery and cultured in Green medium containing 1.2 mM calcium as described previously (7) and in accordance with the Declaration of Helsinki.

For cell cycle analyses, BrdU (10 mM; Sigma-Aldrich) was added for 24 h in the culture medium supplemented with 10% or 2% FCS. For clonogenic assays, 2,000–10,000 total primary keratinocytes per well were plated on a confluent feeder layer of inactivated J2-3T3 fibroblasts (3 h of treatment with mitomycin C at 4 µg/mL; Sigma-Aldrich) grown on collagen-I-coated six-well plates at 32 °C in 8% CO<sub>2</sub> (mouse keratinocytes) or at 37 °C in 10% CO<sub>2</sub> (human keratinocytes). Clonogenic assays were performed in calcium-free DMEM-HamF12 (3:1) (Invitrogen) containing 10% calcium-free FCS (Sigma-Aldrich), 4 mM L-glutamine, 110 mg/L of Na pyruvate, 8 ng/mL of cholera toxin (Sigma-Aldrich), 0.4 µg/mL of hydrocortisone (Sigma-Aldrich), 5 µg/mL of insulin (Sigma-Aldrich), and 10 µg/mL of murine EGF (Roche). Colonies were fixed with 4% PFA and stained with 1% rhodamine B (Sigma-Aldrich). Quantitative analysis of the total number and size of clones was performed with ImageJ software (National Institutes of Health).

**Retroviral and Lentiviral Particle Production and Infections.** Retroviral and lentiviral particles were produced in 293T cells by transient transfection using Jet-PEI reagent (Ozyme) of gag/pol, env-VSV-G, and indicated viral constructs pMSCV-Bmi1 (8), pMKO vector encoding either control or antihuman *E4F1* shRNAs (sequences available on request), pLKO1 encoding shRNAs directed against murine RB1 or p53 (MISSION shRNA





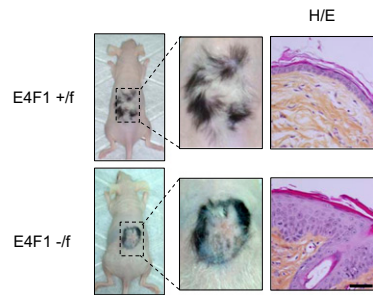

**Fig. S3.** *E4F1* inactivation results in skin autonomous effects in the RERT model. Back skin from *E4F1*<sup>+/flox</sup>;RERT or *E4F1*<sup>-flox</sup>;RERT P1 neonates was engrafted onto recipient nude mice and treated with 4OHT. Photographs at low (*Left*) or higher (*Middle*) magnification of representative engrafted skin were taken at 2 wk after *E4F1* inactivation. (*Right*) H&E-stained sections of engrafted skin showing hyperplasia of *E4F1*-depleted epidermis. (Scale bar: 40  $\mu$ m.)

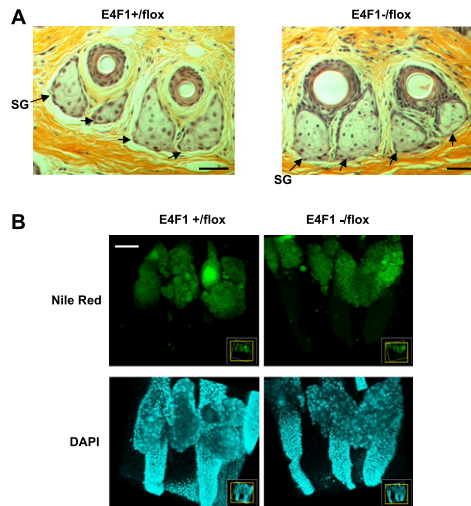

**Fig. S4.** Sebaceous glands appear to be unaltered after *E4F1* inactivation. (*A*) H&E staining of tail skin cross-sections from *E4F1*<sup>+/flox</sup> and *E4F1*<sup>-flox</sup>;RERT at 6 wk after *E4F1* inactivation. Arrows indicate sebaceous glands (SG). (*B*) Nile red (green) staining of sebaceous glands in whole mounts of tail epidermis prepared from *E4F1*<sup>+/flox</sup> and *E4F1*<sup>-flox</sup>;RERT mice at 6 wk after 4OHT application. DAPI staining (blue) shows general morphology. (Scale bar: 100  $\mu$ m.)

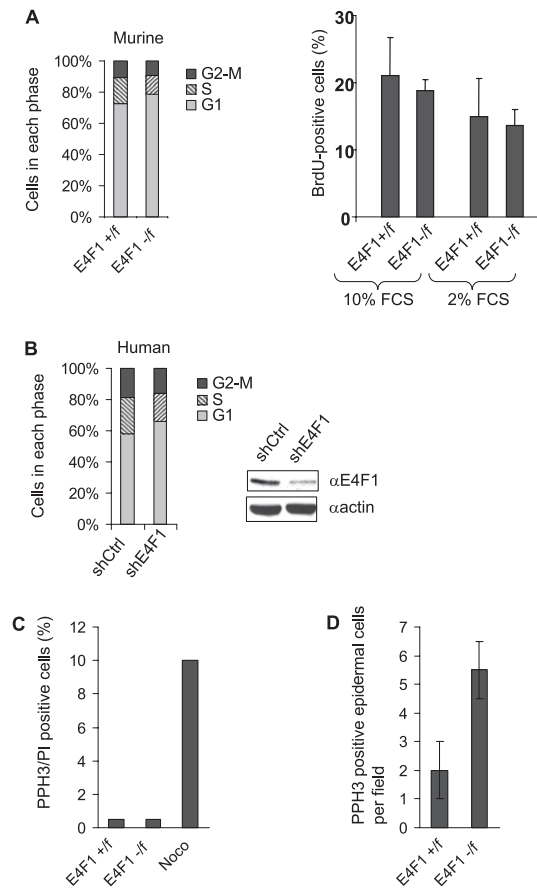

**Fig. S5.** *E4F1* inactivation does not enhance the short-term proliferation of primary keratinocytes in culture. (A) *E4F1* inactivation in vitro does not result in murine keratinocyte hyperproliferation. (Left) Cell cycle profiles of murine *E4F1<sup>+flx</sup>* or *E4F1<sup>-flx</sup>;K5-Cre*. The percentage of cells in each phase of the cell cycle was determined by FACScan analysis after costaining with PI and BrdU. (Right) This absence of hyperproliferation in *E4F1* KO also was observed when cells were cultured in low-serum medium (containing 2% FCS instead of 10% FCS). (B) *E4F1* depletion in vitro does not result in human keratinocyte hyperproliferation. Shown are PI/BrdU costaining profiles of human primary keratinocytes transduced with retroviral vectors expressing either a shRNA targeting human *E4F1* (shE4F1) or a control shRNA (shCtrl). (Right) Western blot analysis of total protein extracts showing efficient *E4F1* depletion. (C) Anti-phosphohistone H3/PI labeling and FACScan analyses of murine *E4F1<sup>+flx</sup>* or *E4F1<sup>-flx</sup>;RERT* primary keratinocytes after 5 d of culture in the presence of 4OHT. Nocodazole-treated cells (Noco, 10  $\mu$ M) were used as positive controls. (D) IHC analysis of dorsal skin sections from *E4F1<sup>+flx</sup>* or *E4F1<sup>-flx</sup>;K5-Cre* P1 neonates with anti-phosphohistone H3 antibody. The number of PPH3-positive cells per field is indicated.



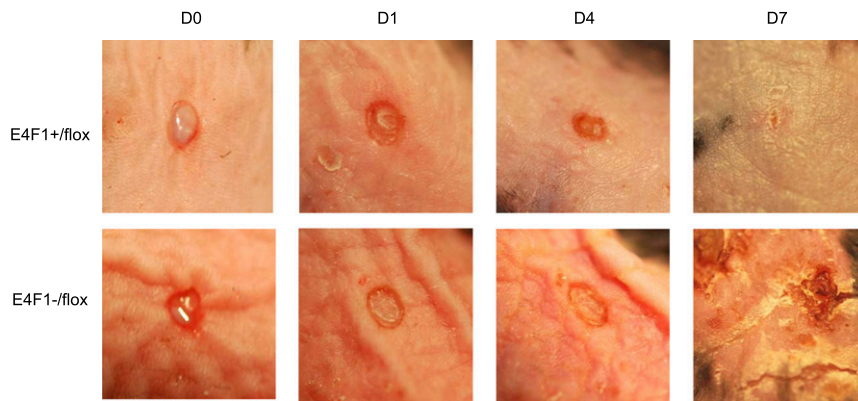

**Fig. 58.** *E4F1* inactivation alters wound healing. A 5-mm full-thickness punch biopsy was made on the back skin of *E4F1*<sup>+/flox</sup> and *E4F1*<sup>-flox</sup>;RERT mice treated with 4OHT 3 d earlier. Wound closure was observed at the indicated time points (0, 1, 4, and 7 d after wounding).

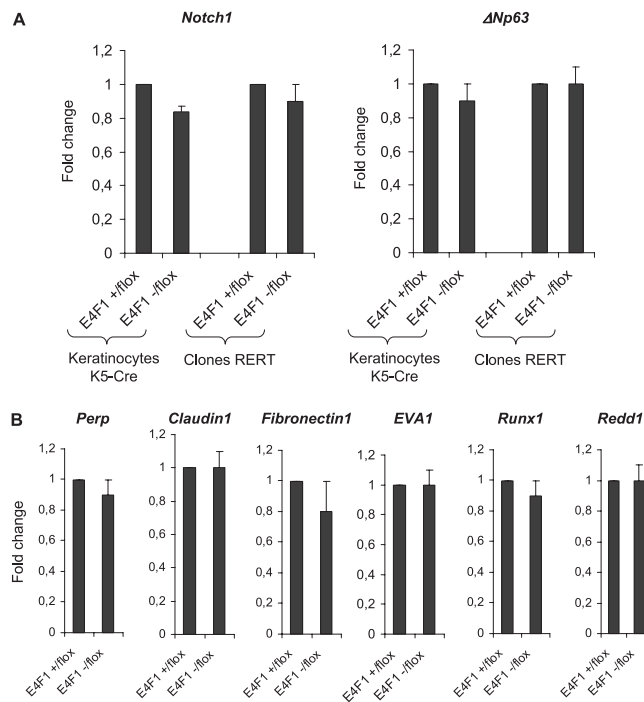

**Fig. 59.** Transcript levels of *Notch1*,  $\Delta Np63$ , and several p63 target genes are unchanged in *E4F1* KO keratinocytes. (A) Quantitative RT-PCR analyses of *Notch1* and  $\Delta Np63$  mRNA levels in keratinocytes isolated from *E4F1*<sup>+/flox</sup> and *E4F1*<sup>-flox</sup>;K5-Cre neonate skin or from clones established from *E4F1*<sup>+/flox</sup> and *E4F1*<sup>-flox</sup>;RERT mice treated with 4OHT in vitro. (B) Quantitative RT-PCR analyses of several p63 transcriptional target genes (*Perp*, *Claudin1*, *Fibronectin1*, *EVA1*, *Runx1*, and *Redd1*) in keratinocytes isolated from *E4F1*<sup>+/flox</sup> and *E4F1*<sup>-flox</sup>;K5-Cre neonate skin.
